# Supplementary material for: An anteroposterior wave of vascular inhibitor downregulation signals aortae fusion along the embryonic midline axis
Source: Oxford University Press journal article supplement (doi:10.1242/dev.051664), 2010-10-12
Supplement: dev051664-table_s2.pdf [file dev051664-table_s2.pdf]

**Table S2. Fusion of the dorsal aortae in unmanipulated quail and chick embryos compared with somite position**

| Quail |                           | Chick |                           |
|-------|---------------------------|-------|---------------------------|
| Stage | Somite position at fusion | Stage | Somite position at fusion |
| 12    | No fusion (n=14)          | 12    | No fusion (n=15)          |
| 13    | 10.7 (n=12)               | 13    | 10.5 (n=13)               |
| 14    | 13.6 (n=10)               | 14    | 13.2 (n=7)                |
| 15    | 16.2 (n=6)                | 15    | 15.9 (n=8)                |
