# Supplementary material for: An anteroposterior wave of vascular inhibitor downregulation signals aortae fusion along the embryonic midline axis
Source: Oxford University Press journal article supplement (doi:10.1242/dev.051664), 2010-10-12
Supplement: dev051664-table_s3.pdf [file dev051664-table_s3.pdf]

**Table S3. Site of Chordin downregulation in the notochord compared with the site of dorsal aortae fusion and somite position in chick**

| Stage | Somite position at fusion | Somite position at undetectable Chordin | Difference        | Number       |
|-------|---------------------------|-----------------------------------------|-------------------|--------------|
| 12    | No fusion                 |                                         |                   | <i>n</i> =5  |
| 13    | 10.5 ( $\pm$ 1.21)        | 15.1 ( $\pm$ 1.04)                      | 4.9 ( $\pm$ 1.30) | <i>n</i> =11 |
| 14    | 13.2 ( $\pm$ 0.52)        | 18.3 ( $\pm$ 0.52)                      | 5.3 ( $\pm$ 0.76) | <i>n</i> =7  |
